# Supplementary figures and images for: SNARE mimic peptide triggered membrane fusion kinetics revealed using single particle techniques
Source: Royal Society of Chemistry journal article supplement (doi:10.1039/d2cp04448j), 2023-01-01

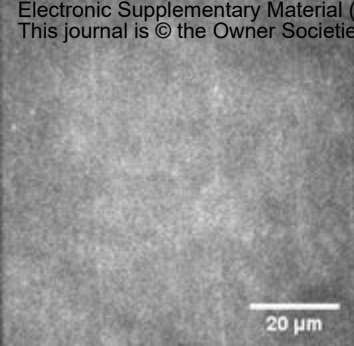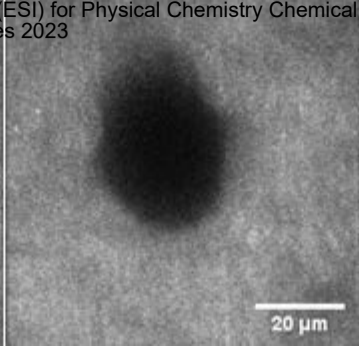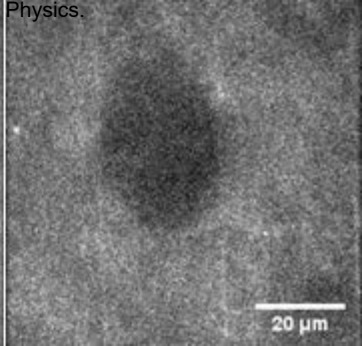

Supplement: d2cp04448j2.pdf [file d2cp04448j2.pdf]

### CPE/CPK

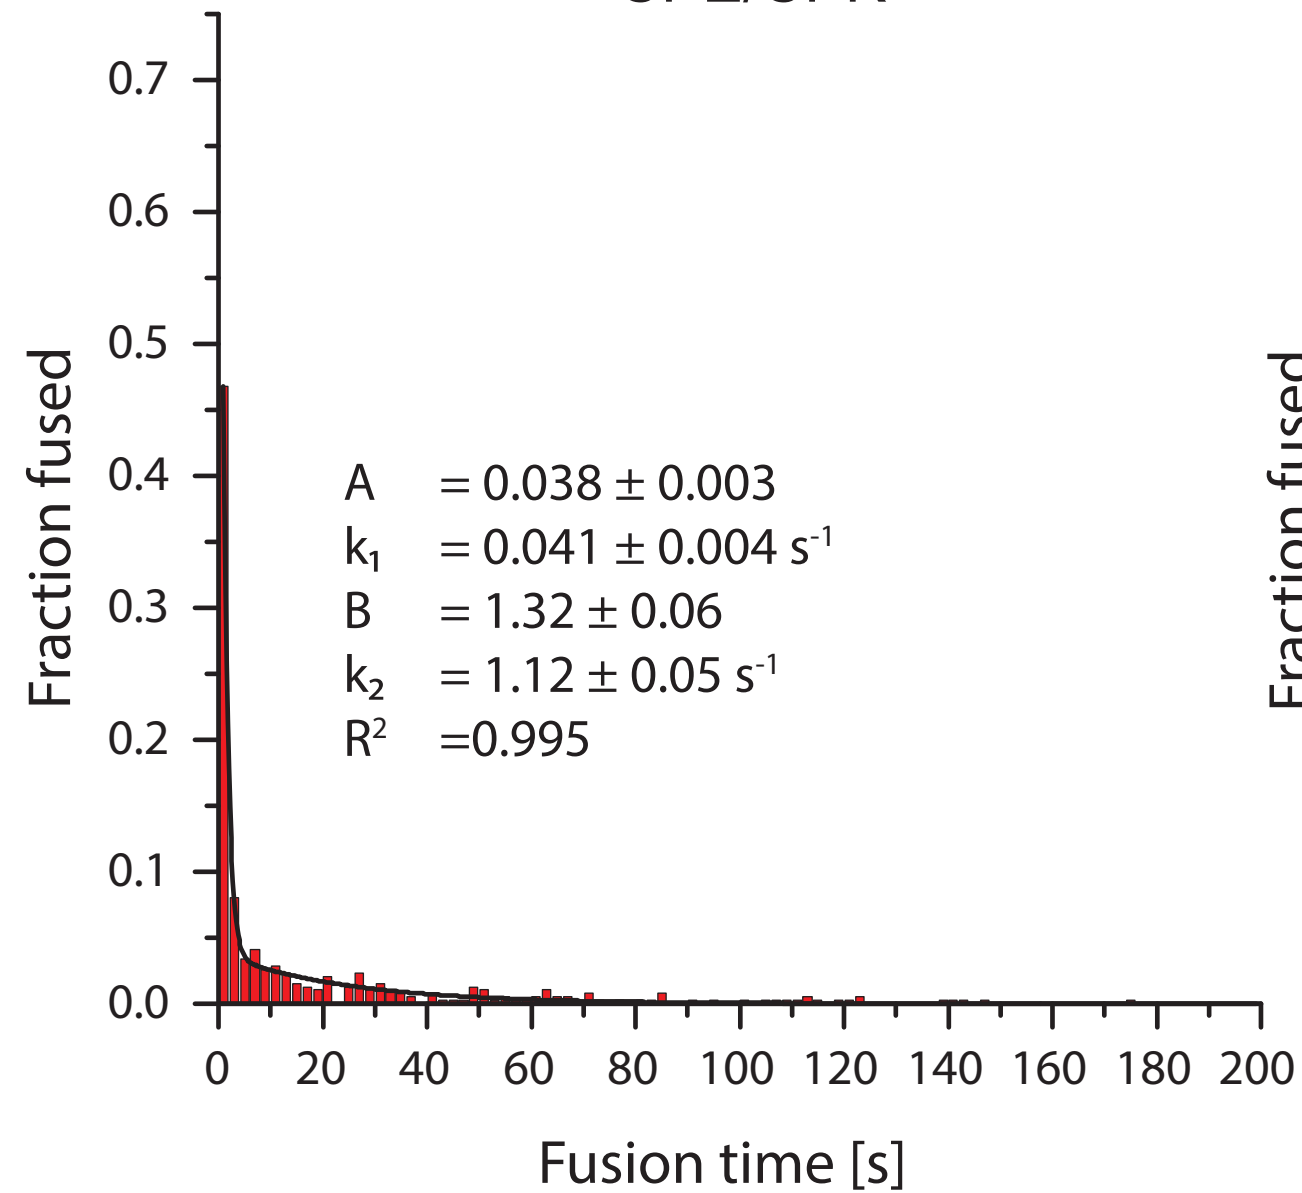

### Plain/CPK

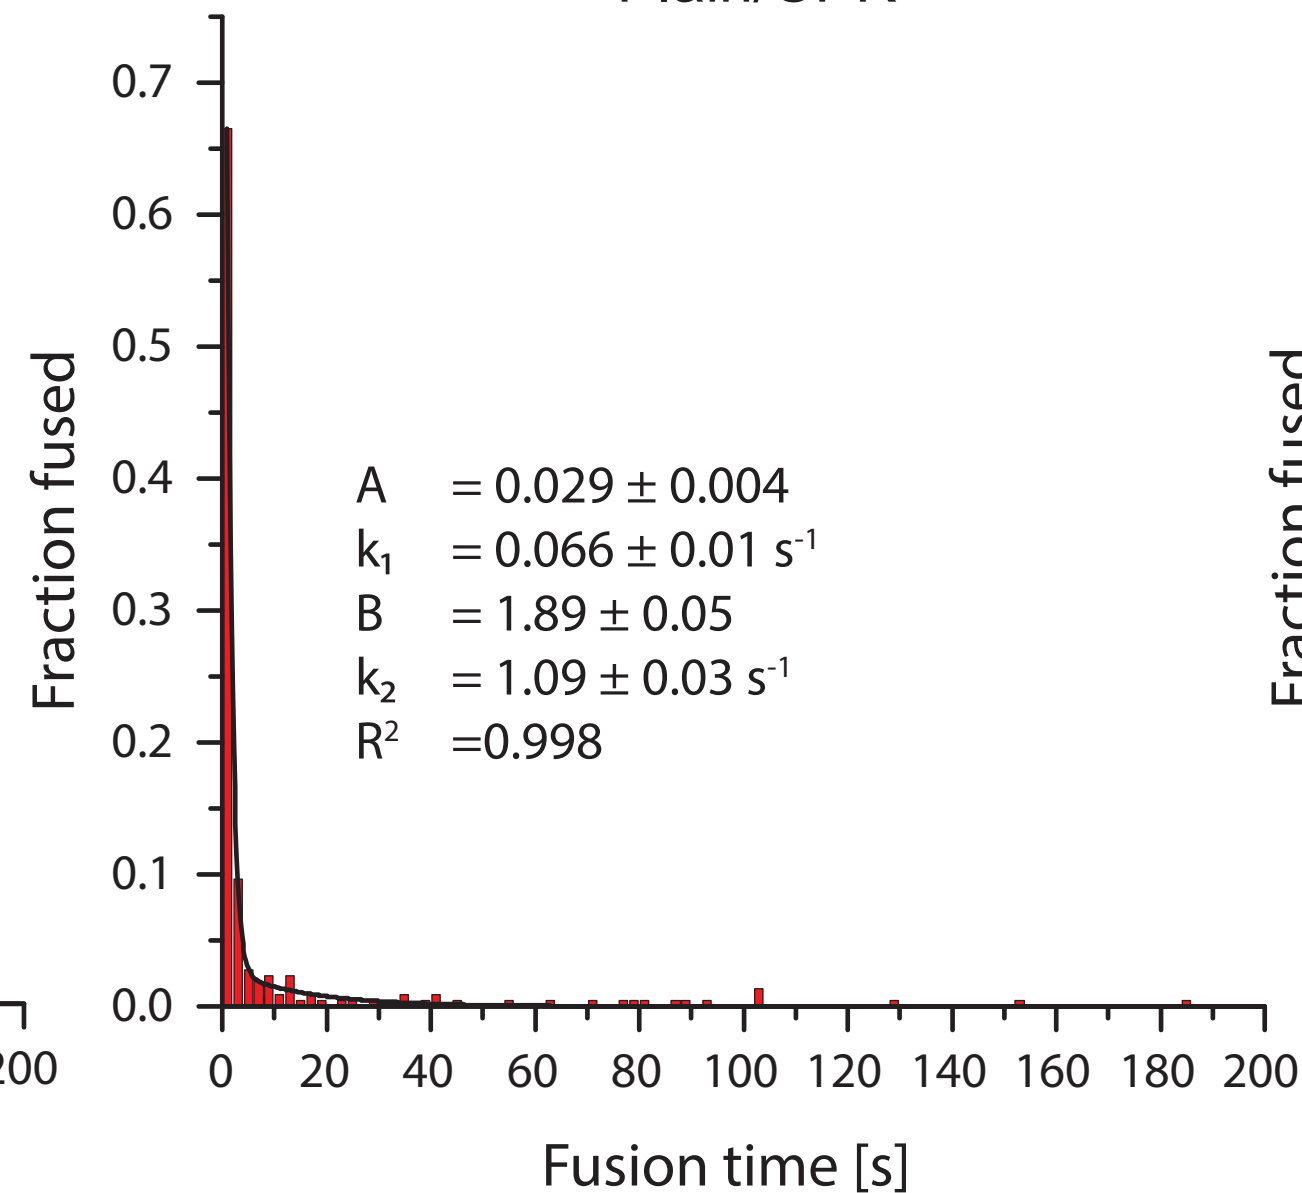

### CPK/CPK

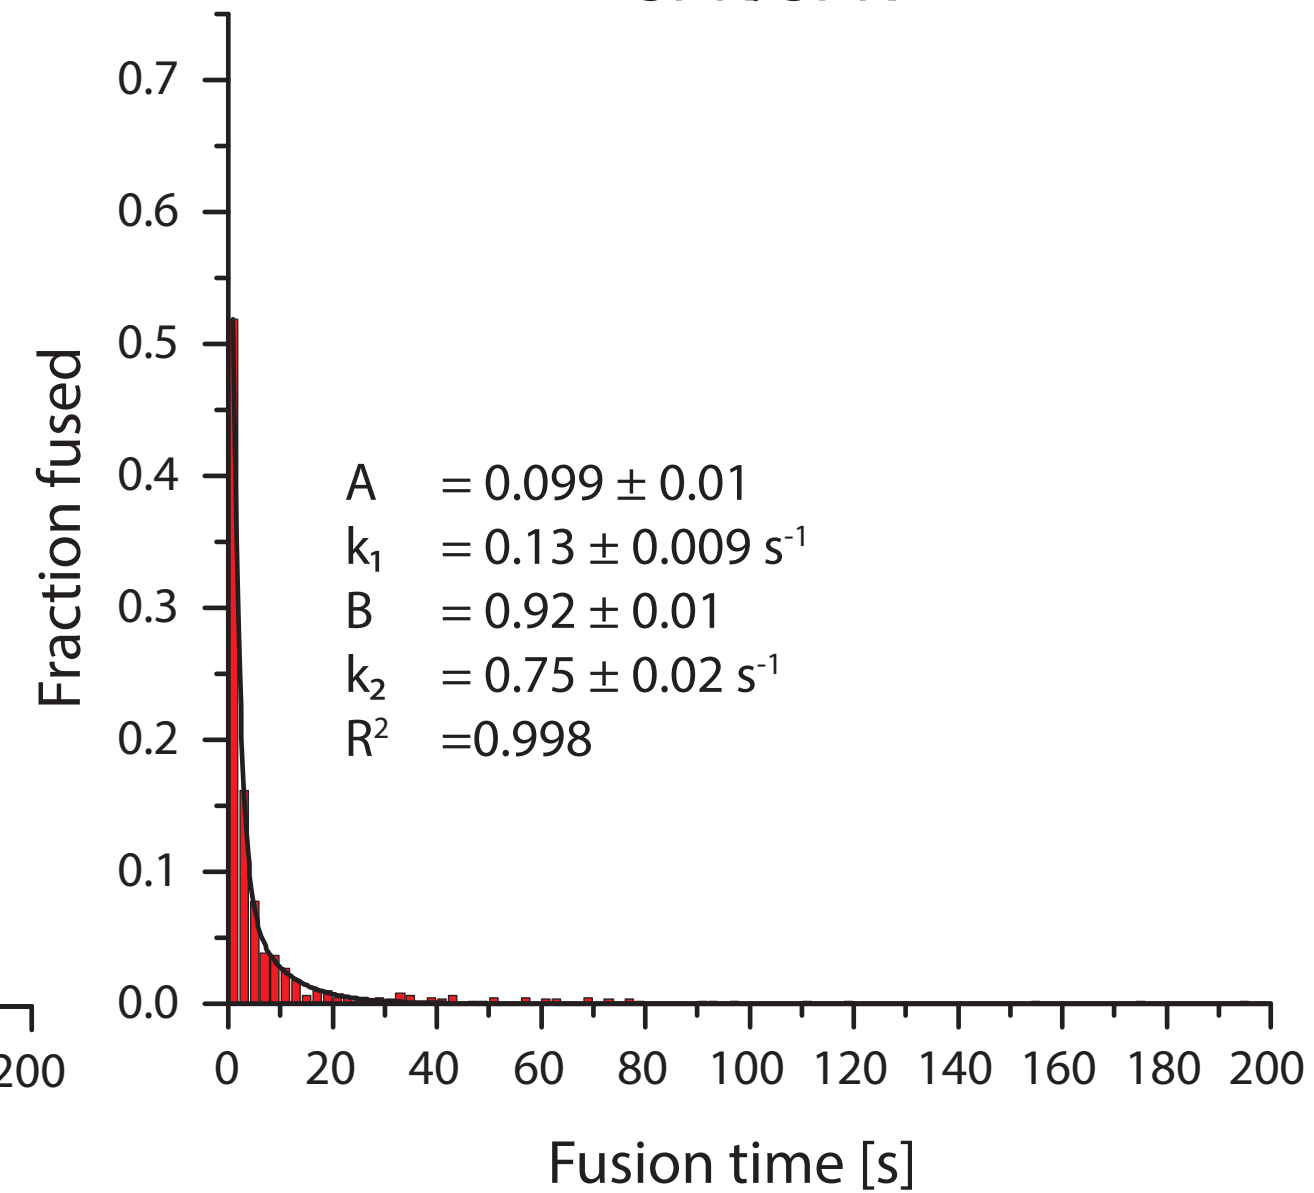

Supplement: d2cp04448j3.pdf [file d2cp04448j3.pdf]
